# Supplementary material for: Fluorescent Zn(ii) frameworks with multicarboxylate and pyridyl N-donor ligands for sensing specific anions and organic molecules
Source: Royal Society of Chemistry journal article supplement (doi:10.1039/d1dt04052a), 2022-01-01
Supplement: d1dt04052a1.pdf [file d1dt04052a1.pdf]

## Electronic Supplementary Information (ESI)

### Fluorescent Zn(II) frameworks with multicarboxylate and pyridyl N-donor ligands for sensing specific anions and organic molecules

Shu-Man Zhao,<sup>a</sup> Zhao-Feng Qiu,<sup>b</sup> Zou-Hong Xu,<sup>a</sup> Zi-Qing Huang,<sup>a</sup> Yue Zhao<sup>a</sup> and Wei-Yin Sun<sup>\*,a</sup>

<sup>a</sup> Coordination Chemistry Institute, State Key Laboratory of Coordination Chemistry, School of Chemistry and Chemical Engineering, Nanjing National Laboratory of Microstructures, Collaborative Innovation Center of Advanced Microstructures, Nanjing University, Nanjing 210023, China

<sup>b</sup> College of Chemistry and Environmental Engineering, Yangtze University, Jingzhou 434023, China

*Email address:* sunwy@nju.edu.cn (W.Y. Sun)

#### EXPERIMENTAL

##### X-ray crystallography

The crystallographic data of **1–3** were obtained on Bruker D8 VENTURE and Bruker smart apex II CCD area detector diffractometers with graphite-monochromated Ga K $\alpha$  ( $\lambda = 1.34139$  Å) and Mo K $\alpha$  ( $\lambda = 0.71073$  Å) radiations. The integration of the diffraction data and the intensity correction for Lorentz and polarization effects were performed using the SAINT program. Semi-empirical absorption correction was carried out using SADABS program. SHELXT-2014 was used to solve the structures of **1–3** through the direct method, and SHELXL-2018 program was used to refine the structures by the full matrix least square method.<sup>1</sup> The hydrogen atoms were generated in geometric forms and refined isotropically. Due to the highly disordered solvent molecules in **1–3**, SQUEEZE subroutine of PLATON software was applied to remove them. Finally, the crystal parameters, data collection and refinements are summarized in **Table 1**, and the selected bond lengths and angles were listed in **Table S1**.

**Table S1.** Selected bond lengths (Å) and angles (°) for **1–3**.

| <b>1</b>                                                                                                                             |            |                      |            |
|--------------------------------------------------------------------------------------------------------------------------------------|------------|----------------------|------------|
| Zn(1)-O(4)#1                                                                                                                         | 1.9710(18) | Zn(1)-O(1)           | 1.9313(18) |
| Zn(1)-N(1)                                                                                                                           | 2.052(2)   | Zn(1)-N(2)           | 2.052(2)   |
| O(1)-Zn(1)-O(4)#1                                                                                                                    | 109.76(8)  | O(4)#1-Zn(1)-N(1)    | 124.07(9)  |
| O(1)-Zn(1)-N(2)                                                                                                                      | 96.95(9)   | N(2)-Zn(1)-N(1)      | 101.49(9)  |
| Symmetry transformations used to generate equivalent atoms: #1 +X, -Y, 1/2+Z                                                         |            |                      |            |
| <b>2</b>                                                                                                                             |            |                      |            |
| Zn(1)-O(4)                                                                                                                           | 2.048(4)   | Zn(1)-O(5)#1         | 2.054(4)   |
| Zn(1)-O(6)                                                                                                                           | 2.023(4)   | Zn(1)-O(7)#1         | 2.062 (4)  |
| Zn(1)-N(3)                                                                                                                           | 2.031(4)   | Zn(2)-O(1)#2         | 2.021(3)   |
| Zn(2)-O(2)                                                                                                                           | 2.056(4)   | Zn(2)-O(9)#3         | 2.053(4)   |
| Zn(2)-O(10)#4                                                                                                                        | 2.043(4)   | Zn(2)-N(1)           | 2.028(4)   |
| O(4)-Zn(1)-O(6)                                                                                                                      | 87.18(15)  | O(4)-Zn(1)-O(7)#1    | 88.50(16)  |
| O(5)#1-Zn(1)-O(4)                                                                                                                    | 159.80(13) | O(5)#1-Zn(1)-O(6)    | 89.86(18)  |
| O(5)#1-Zn(1)-O(7)#1                                                                                                                  | 87.29(17)  | O(7)#1-Zn(1)-O(6)    | 159.42(14) |
| N(3)-Zn(1)-O(4)                                                                                                                      | 103.14(16) | N(3)-Zn(1)-O(5)#1    | 97.00(17)  |
| N(3)-Zn(1)-O(6)                                                                                                                      | 103.18(16) | N(3)-Zn(1)-O(7)#1    | 97.39(17)  |
| O(1)#2-Zn(2)-O(2)                                                                                                                    | 159.89(13) | O(1)#2-Zn(2)-O(9)#3  | 87.33(15)  |
| O(1)#2-Zn(2)-O(10)#4                                                                                                                 | 89.37(17)  | O(9)#3-Zn(2)-O(2)    | 87.92(17)  |
| O(10)#4-Zn(2)-O(2)                                                                                                                   | 88.25(18)  | O(10)#4-Zn(2)-O(9)#3 | 159.45(13) |
| O(1)#2-Zn(2)-N(1)                                                                                                                    | 102.60(15) | N(1)-Zn(2)-O(2)      | 97.51(16)  |
| N(1)-Zn(2)-O(9)#3                                                                                                                    | 103.61(16) | N(1)-Zn(2)-O(10)#4   | 96.91(17)  |
| Symmetry transformations used to generate equivalent atoms:<br>#1 1-X, 1-Y, 2-Z; #2 1-X, -Y, 1-Z; #3 1-X, 1-Y, 1-Z; #4 +X, -1+Y, +Z; |            |                      |            |

---

**3**

---

|                   |            |                     |            |
|-------------------|------------|---------------------|------------|
| Zn(1)#1-O(1)#1    | 2.474(3)   | Zn(1)#1-O(2)#1      | 2.060(2)   |
| Zn(1)-O(5)        | 2.025(3)   | Zn(1)-O(6)          | 2.297(3)   |
| Zn(1)-N(2)        | 2.087(3)   | Zn(1)-N(4)          | 2.036(3)   |
| N(2)-Zn(1)-O(1)#1 | 154.88(11) | N(2)-Zn(1)-O(6)     | 92.89(14)  |
| N(4)-Zn(1)-N(2)   | 97.95(12)  | N(4)-Zn(1)-O(1)#1   | 86.81(12)  |
| N(4)-Zn(1)-O(2)#1 | 101.28(11) | N(4)-Zn(1)-O(6)     | 93.98(12)  |
| O(2)#1-Zn(1)-N(2) | 98.04(11)  | O(2)#1-Zn(1)-O(1)#1 | 56.89(10)  |
| O(2)#1-Zn(1)-O(6) | 159.75(11) | O(5)-Zn(1)-N(2)     | 100.97(13) |
| O(5)-Zn(1)-N(4)   | 148.06(15) | O(5)-Zn(1)-O(1)#1   | 86.85(12)  |
| O(5)-Zn(1)-O(2)#1 | 101.27(11) | O(5)-Zn(1)-O(6)     | 59.72(12)  |
| O(6)-Zn(1)-O(1)#1 | 111.45(13) |                     |            |

Symmetry transformations used to generate equivalent atoms:

#1 1+X, +Y, 1+Z;

---

**Table S2** Hydrogen bonding data for **3**.

| D-H...A               | D-H  | H...A | D...A    | D-H...A |
|-----------------------|------|-------|----------|---------|
| O(3)-H(3) ...O(2)#1   | 0.84 | 1.81  | 2.619(4) | 160     |
| C(24)-H(24) ...O(2)#2 | 0.95 | 2.48  | 3.362(7) | 155     |
| C(32)-H(32) ...O(4)#3 | 0.95 | 2.52  | 3.467(5) | 176     |
| C(35)-H(35) ...O(4)#4 | 0.93 | 2.39  | 3.208(6) | 144     |

Symmetry codes: #1 +X, -1+Y, +Z; #2 1-X, 2-Y, -Z; #3 1-X, 1-Y, 1-Z; #4 1+X,  
1+Y, 1+Z

**Table S3** The related parameter for fluorescence detection of analytes by **1–3** and various reported MOFs

| MOF                                                                                                                                  | Analytes                                     | $K_{sv}$                          | Working range    | LOD                             | Ref.      |
|--------------------------------------------------------------------------------------------------------------------------------------|----------------------------------------------|-----------------------------------|------------------|---------------------------------|-----------|
| {[Zn(IPA)(L <sub>2</sub> )]} <sub>n</sub>                                                                                            | CrO <sub>4</sub> <sup>2-</sup>               | $1.00 \times 10^3 \text{ M}^{-1}$ | 0–1 mM           | $1.83 \times 10^{-5} \text{ M}$ | 2         |
|                                                                                                                                      | Cr <sub>2</sub> O <sub>7</sub> <sup>2-</sup> | $1.37 \times 10^3 \text{ M}^{-1}$ | 0–1 mM           | $1.20 \times 10^{-5} \text{ M}$ |           |
| [Tb <sub>2</sub> (H <sub>3</sub> L)(C <sub>2</sub> O <sub>4</sub> ) <sub>3</sub> (H <sub>2</sub> O) <sub>4</sub> ]·2H <sub>2</sub> O | CrO <sub>4</sub> <sup>2-</sup>               | $3.63 \times 10^3 \text{ M}^{-1}$ | 0–0.44 mM        | $3.7 \times 10^{-6} \text{ M}$  | 3         |
|                                                                                                                                      | Cr <sub>2</sub> O <sub>7</sub> <sup>2-</sup> | $7.78 \times 10^3 \text{ M}^{-1}$ | 0–0.44 mM        | $4.2 \times 10^{-6} \text{ M}$  |           |
| Eu <sub>4</sub> L <sub>3</sub>                                                                                                       | CrO <sub>4</sub> <sup>2-</sup>               | -                                 | -                | --                              | 4         |
|                                                                                                                                      | Cr <sub>2</sub> O <sub>7</sub> <sup>2-</sup> | $1526 \text{ M}^{-1}$             | 0–0.5 mM         |                                 |           |
| [Zn(btz)] <sub>n</sub>                                                                                                               | CrO <sub>4</sub> <sup>2-</sup>               | $3.19 \times 10^3 \text{ M}^{-1}$ | 0.010–1.8 Mm     | $1.0 \times 10^{-5} \text{ M}$  | 5         |
|                                                                                                                                      | Cr <sub>2</sub> O <sub>7</sub> <sup>2-</sup> | $4.23 \times 10^3 \text{ M}^{-1}$ | 0.020–1.8 mM     | $2.0 \times 10^{-6} \text{ M}$  |           |
| [EuL(CH <sub>3</sub> COO)Cl] <sub>n</sub>                                                                                            | CrO <sub>4</sub> <sup>2-</sup>               | $2.52 \times 10^4 \text{ M}^{-1}$ | 0.00074–0.022 mM | $8.54 \times 10^{-5} \text{ M}$ | 6         |
|                                                                                                                                      | Cr <sub>2</sub> O <sub>7</sub> <sup>2-</sup> | $1.15 \times 10^4 \text{ M}^{-1}$ | 0.0037–0.13 mM   | $8.63 \times 10^{-5} \text{ M}$ |           |
| [Cd <sub>3</sub> (H <sub>2</sub> O) <sub>3</sub> (L)(tib) <sub>2</sub> ]·5DMA·3H <sub>2</sub> O                                      | TNP                                          | $1.16 \times 10^4 \text{ M}^{-1}$ | 0–0.12 mM        | $7.4 \times 10^{-5} \text{ M}$  | 7         |
| {[Cd(IPA)(L)]} <sub>n</sub>                                                                                                          | TNP                                          | $1.35 \times 10^4 \text{ M}^{-1}$ | -                | $4.15 \times 10^{-5} \text{ M}$ | 2         |
| {[NaCd <sub>2</sub> (L <sub>4</sub> )(DMF) <sub>3</sub> ]·(Me <sub>2</sub> NH <sub>2</sub> )(3DMF)} <sub>n</sub>                     | TNP                                          | $1.56 \times 10^4 \text{ M}^{-1}$ | 0–0.5 mM         | $6 \times 10^{-8} \text{ M}$    | 8         |
| [{Zn(BINDI) <sub>0.5</sub> (bpe)}·3H <sub>2</sub> O] <sub>n</sub>                                                                    | TNP                                          | $1.29 \times 10^4 \text{ M}^{-1}$ | 0–0.03 mM        | 1.5 ppm                         | 9         |
| [Cd(tib)(H <sub>2</sub> dhbqdc) <sub>0.5</sub> (NO <sub>3</sub> )·6H <sub>2</sub> O                                                  | TNP                                          | $1.7 \times 10^3 \text{ M}^{-1}$  | -                | -                               | 10        |
| [Zn <sub>2</sub> (tphn)(2,6-NDC) <sub>2</sub> ]                                                                                      | TNP                                          | $2.4 \times 10^3 \text{ M}^{-1}$  | -                | 19 ppm                          | 11        |
| [{Eu(SIP)(H <sub>2</sub> O) <sub>4</sub> }] <sub>n</sub>                                                                             | Benzaldehyde                                 | $9.80 \times 10^3 \text{ M}^{-1}$ | -                | $1 \times 10^{-6} \text{ M}$    | 12        |
| [Co(TBTA)(L <sub>3</sub> ) <sub>1.5</sub> ] <sub>n</sub>                                                                             | Benzaldehyde                                 | $3471 \text{ M}^{-1}$             | 0–0.3 mM         | $3.11 \times 10^{-6} \text{ M}$ | 13        |
| [Cd <sub>0.5</sub> (TBC)] <sub>n</sub>                                                                                               | Benzaldehyde                                 | $5.02 \times 10^2 \text{ M}^{-1}$ | -                | -                               | 14        |
| [Zn(DTBDA)]-(DMA)(MeOH) <sub>2</sub> (H <sub>2</sub> O) <sub>3.5</sub>                                                               | Benzaldehyde                                 | -                                 | 0–0.35%          | -                               | 15        |
| {[Sm <sub>2</sub> Zn(abtc) <sub>2</sub> (H <sub>2</sub> O) <sub>4</sub> ]·2H <sub>2</sub> O} <sub>∞</sub>                            | Benzaldehyde                                 | $13.62 \text{ M}^{-1}$            | 0–0.2 M          | -                               | 16        |
| [Zn(DPA)(NDA)] <sub>2</sub> ·2DMF ( <b>1</b> )                                                                                       | TNP                                          | $1.40 \times 10^4 \text{ M}^{-1}$ | 0–0.061 mM       | $7.7 \times 10^{-5} \text{ M}$  | This work |
| [Zn <sub>2</sub> (DPA)(OBA) <sub>2</sub> ]·2DMF·4H <sub>2</sub> O ( <b>2</b> )                                                       | TNP                                          | $1.54 \times 10^4 \text{ M}^{-1}$ | 0–0.061 mM       | $6.4 \times 10^{-5} \text{ M}$  | This work |
|                                                                                                                                      | Benzaldehyde                                 | $27.79 \text{ M}^{-1}$            | 0–20 mM          | $3.8 \times 10^{-3} \text{ M}$  | This work |
| [Zn(DPA)(HNTB)]·H <sub>2</sub> O ( <b>3</b> )                                                                                        | TNP                                          | $1.22 \times 10^4 \text{ M}^{-1}$ | 0–0.061 mM       | $9.0 \times 10^{-5} \text{ M}$  | This work |
|                                                                                                                                      | CrO <sub>4</sub> <sup>2-</sup>               | $4.05 \times 10^3 \text{ M}^{-1}$ | 0–0.38 mM        | $1.48 \times 10^{-4} \text{ M}$ | This work |
|                                                                                                                                      | Cr <sub>2</sub> O <sub>7</sub> <sup>2-</sup> | $4.03 \times 10^3 \text{ M}^{-1}$ | 0–0.38 mM        | $2.58 \times 10^{-4} \text{ M}$ | This work |

**Table S4** The QY of **1–3** before and after the sensing of analytes

| MOF | Analyte                                      | QY of MOF (%) | QY of MOF after sensing of analytes (%) |
|-----|----------------------------------------------|---------------|-----------------------------------------|
| 1   | TNP                                          | 40.95         | 39.43                                   |
| 2   | TNP                                          |               | 7.69                                    |
|     | Benzaldehyde                                 | 6.64          | 7.99                                    |
| 3   | TNP                                          |               | 9.46                                    |
|     | CrO <sub>4</sub> <sup>2-</sup>               | 7.04          | 7.72                                    |
|     | Cr <sub>2</sub> O <sub>7</sub> <sup>2-</sup> |               | 7.52                                    |

**Table S5** Fluorescence lifetime for **1–3** before and after addition of CrO<sub>4</sub><sup>2-</sup>, Cr<sub>2</sub>O<sub>7</sub><sup>2-</sup>, TNP and benzaldehyde.

| MOF | Analyte                                      | MOF (ns)      |                | MOF + analyte (ns) |                |
|-----|----------------------------------------------|---------------|----------------|--------------------|----------------|
|     |                                              | Lifetime (ns) | R <sup>2</sup> | Lifetime (ns)      | R <sup>2</sup> |
| 1   | TNP                                          | 7.44          | 0.99952        | 7.13               | 0.99948        |
| 2   | TNP                                          | 5.15          | 0.99947        | 6.53               | 0.99947        |
|     | Benzaldehyde                                 | 5.46          | 0.99938        | 3.91               | 0.99943        |
| 3   | TNP                                          | 4.62          | 0.99947        | 5.80               | 0.99943        |
|     | CrO <sub>4</sub> <sup>2-</sup>               | 3.38          | 0.99947        | 3.23               | 0.99948        |
|     | Cr <sub>2</sub> O <sub>7</sub> <sup>2-</sup> | 3.32          | 0.99955        | 3.36               | 0.99934        |

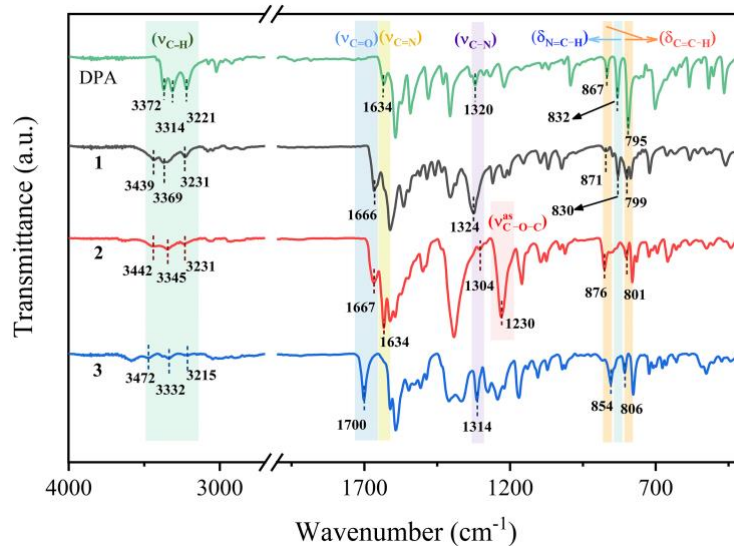

**Fig. S1** IR spectra of 1–3 and DPA.

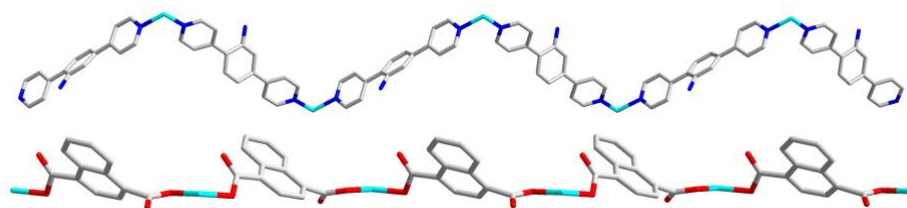

**Fig. S2** 1D chains of Zn(II)-DPA (upper) and Zn(II)-NDA<sup>2-</sup> (below) in 1.

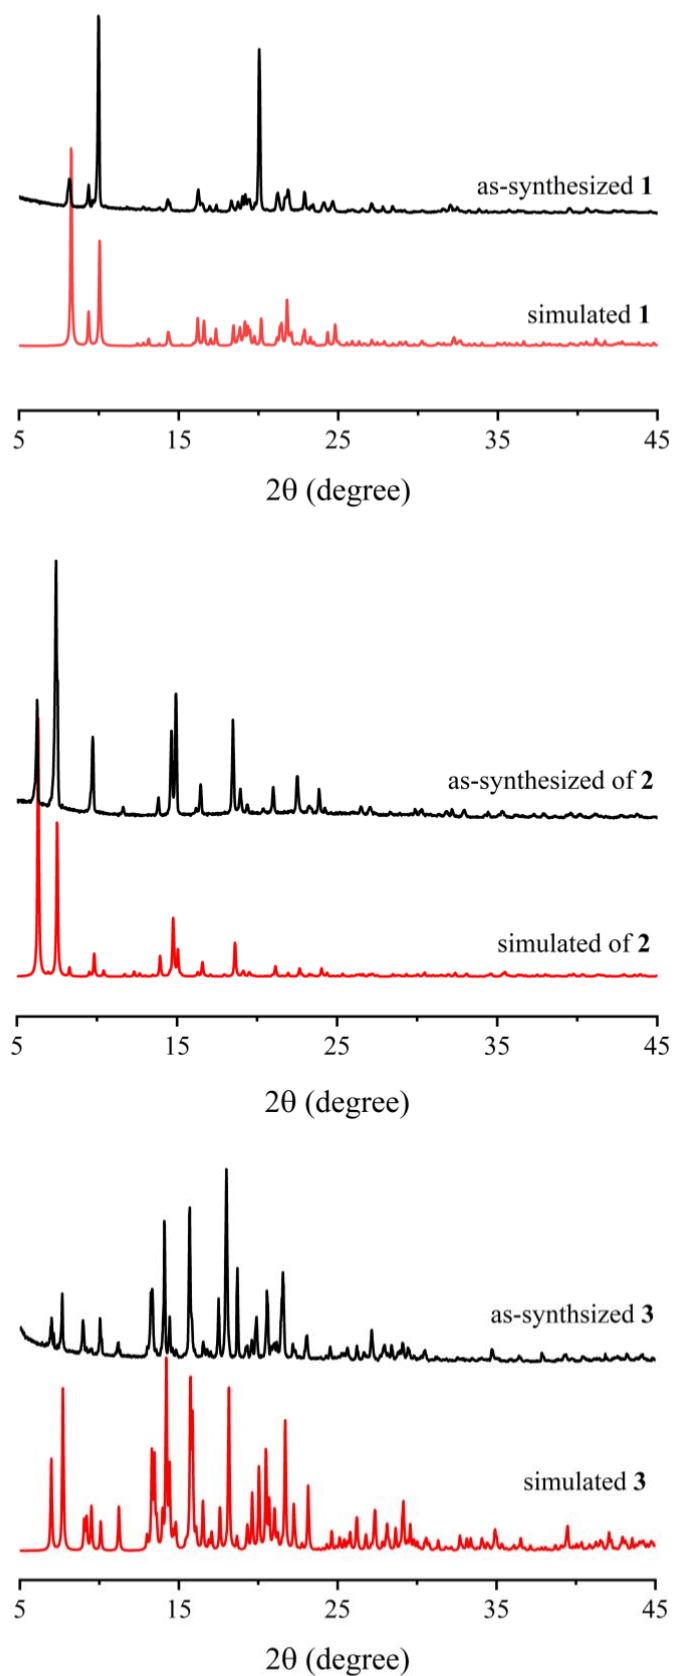

**Fig. S3** PXRD patterns of 1–3.



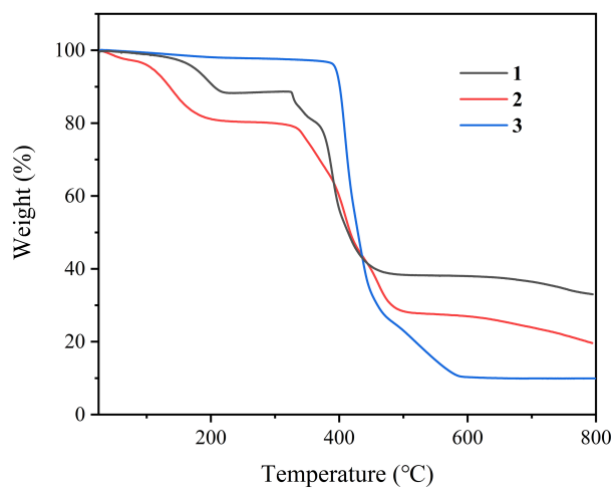

**Fig. S4** TG curves of **1–3**.

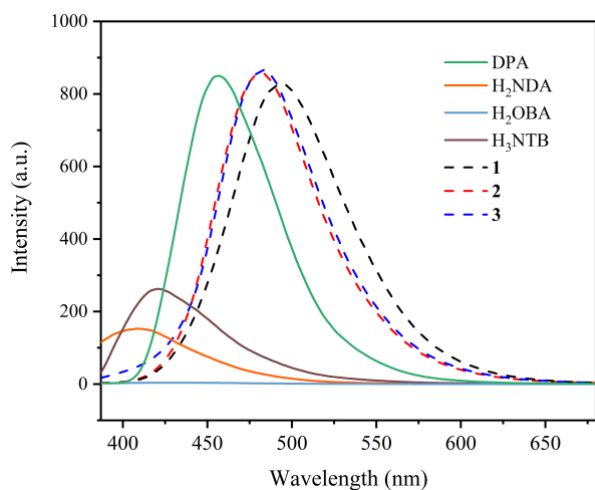

**Fig. S5** Emission spectra of **1–3** and ligands in DMF at room temperature ( $\lambda_{ex} = 367$  nm).

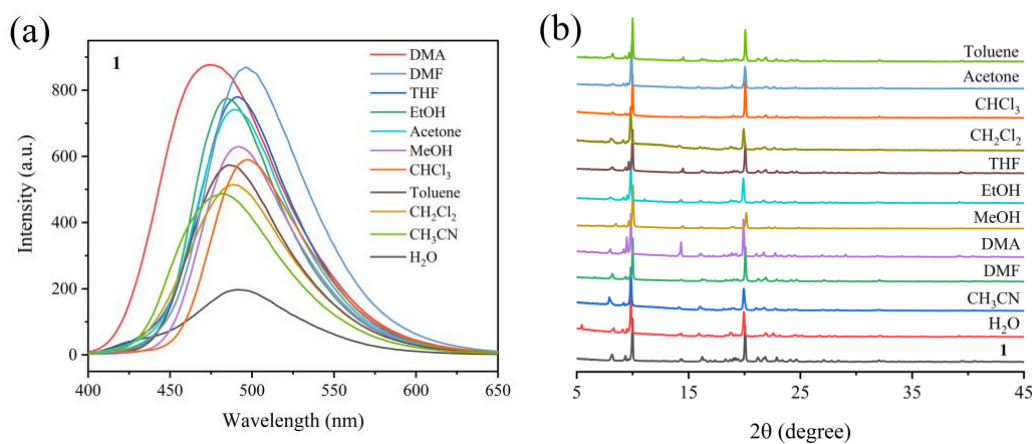

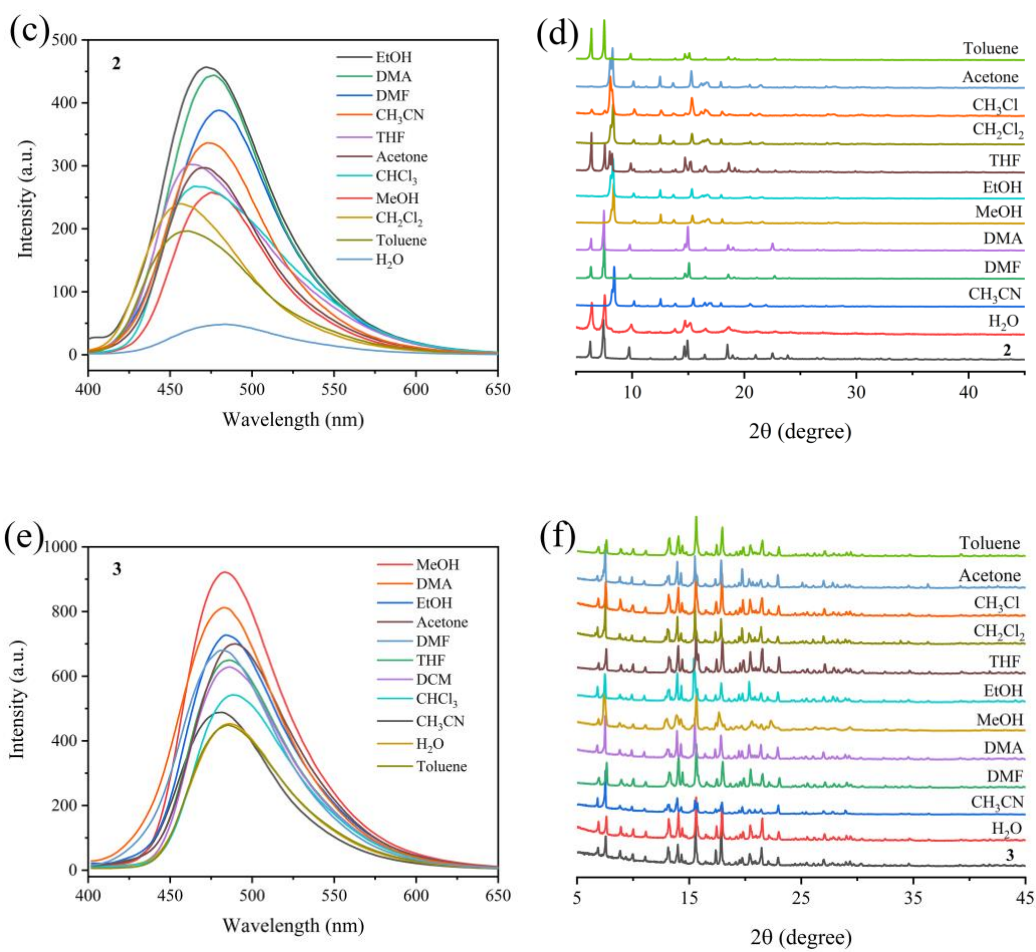

**Fig. S6** Fluorescence spectra and PXRD patterns of 1–3 in different solvent.

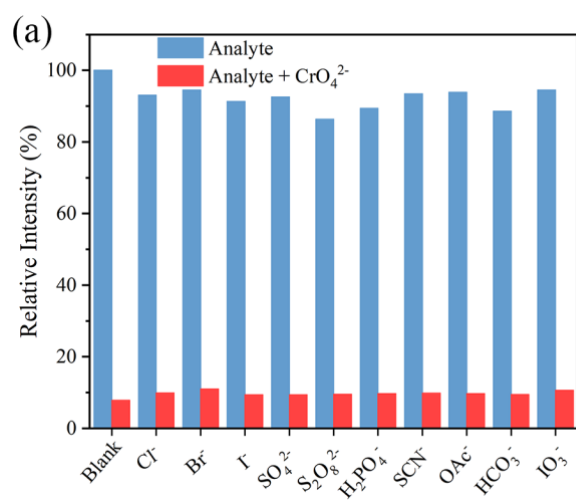

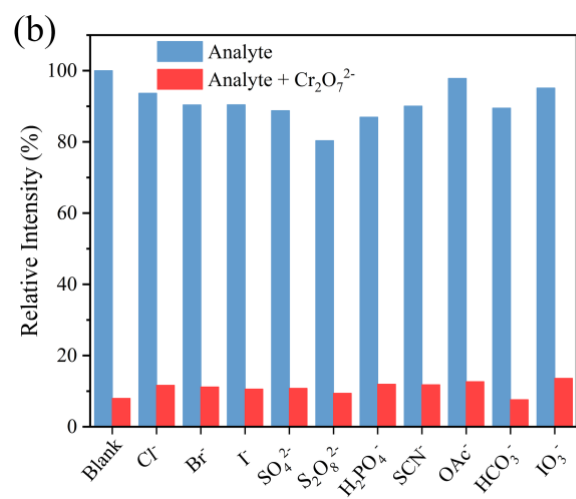

**Fig. S7** Luminescent responses of **3** exposed to different anions in water.

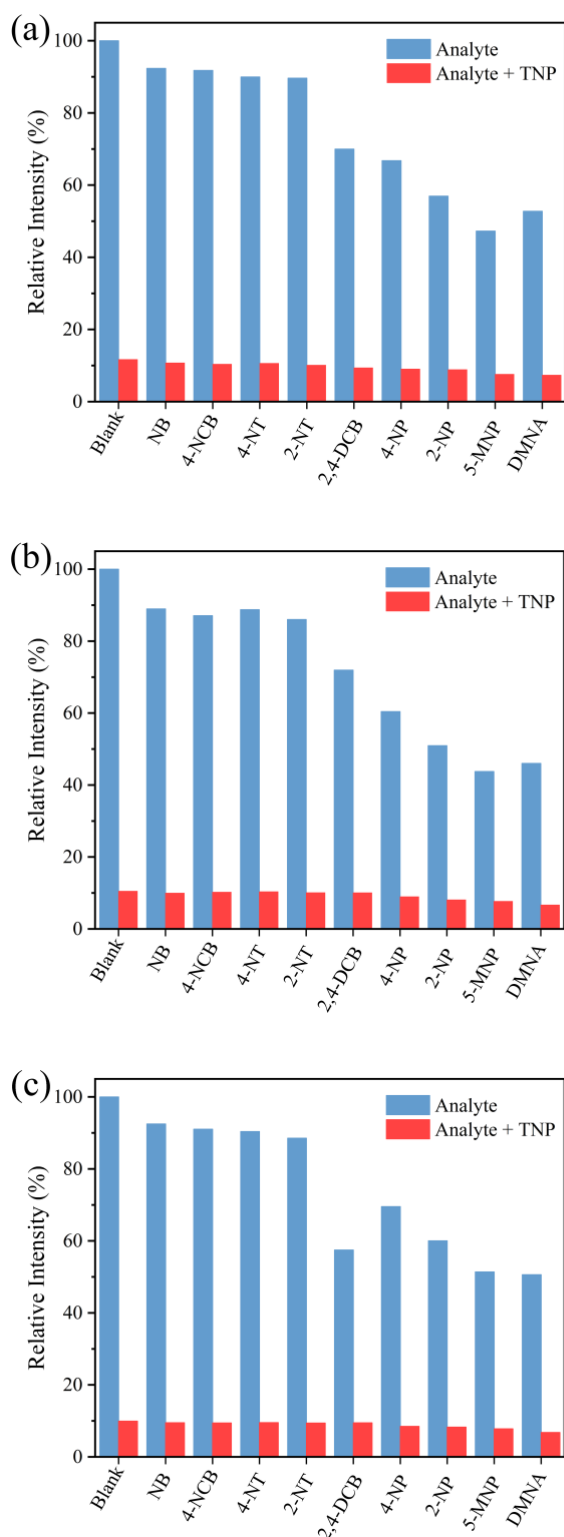

**Fig. S8** Luminescent responses of **1–3** exposed to different NACs in DMF solvent.

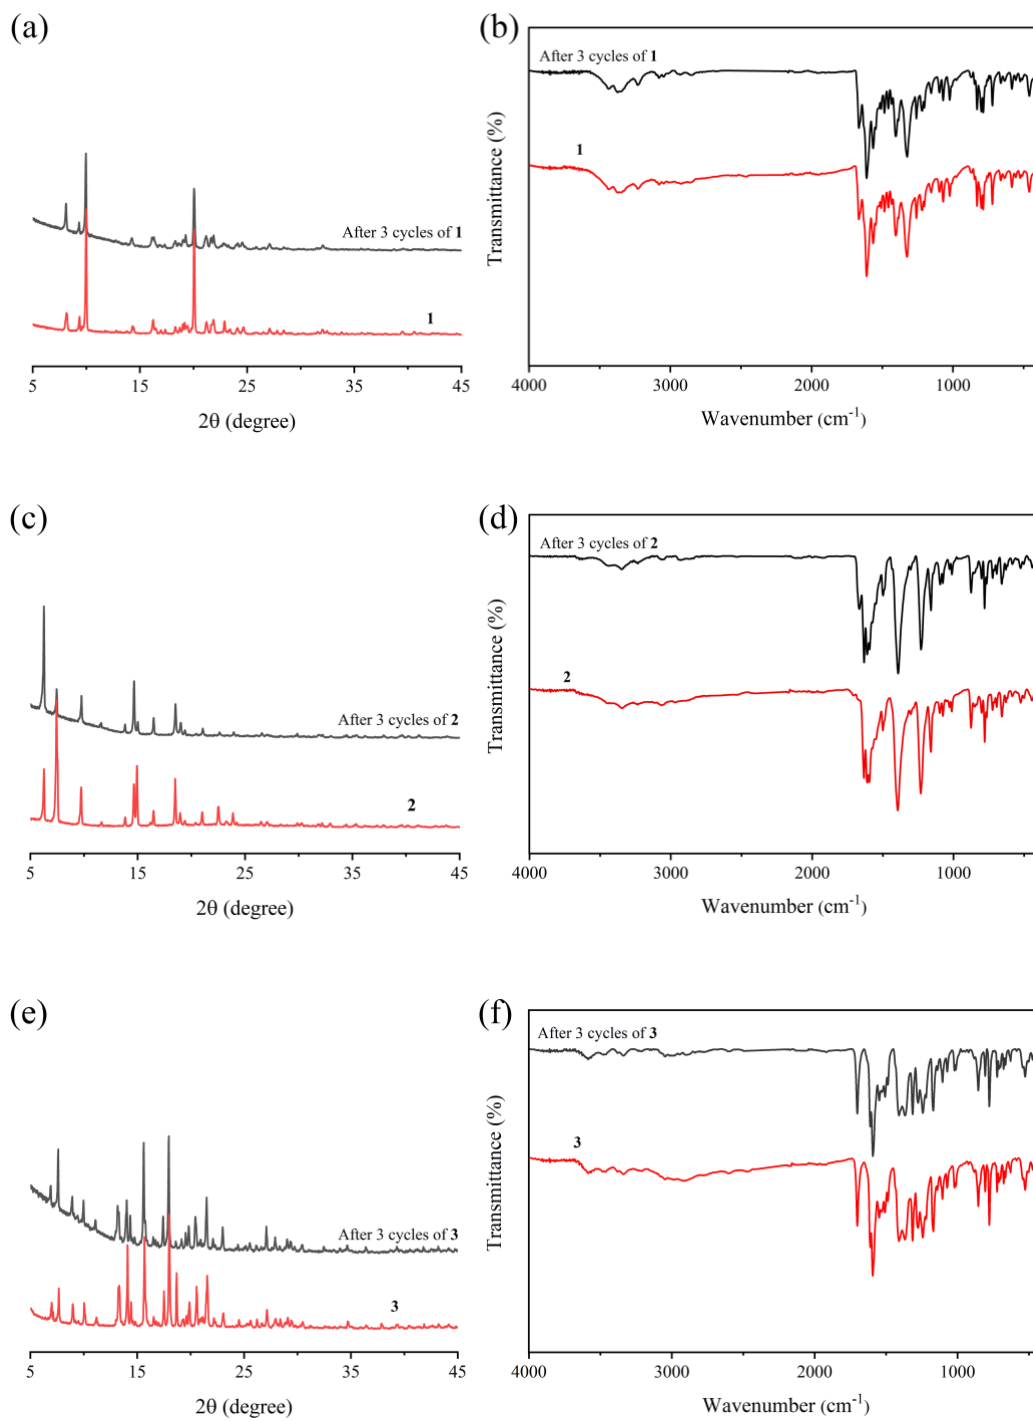

**Fig. S9** XRD patterns and IR spectra of 1–3 after three cycles for sensing TNP.

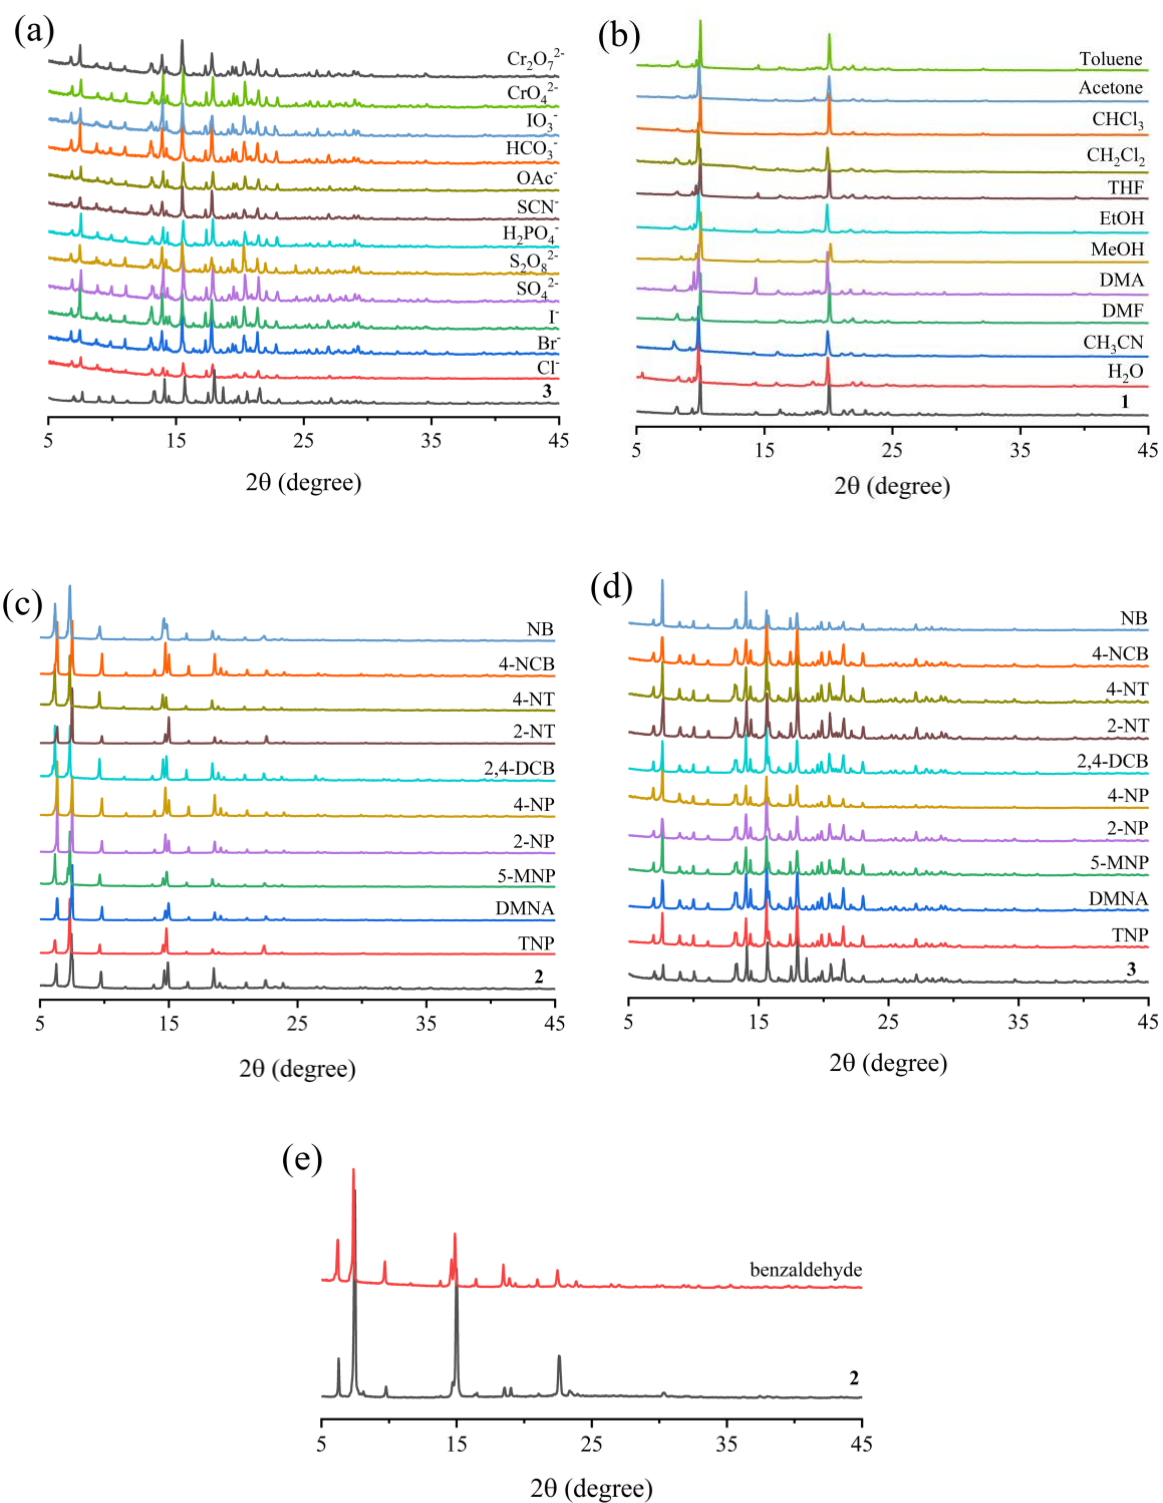

**Fig. S10** XRD patterns of 1–3 after immersion in various anions, NAC and benzaldehyde solutions.

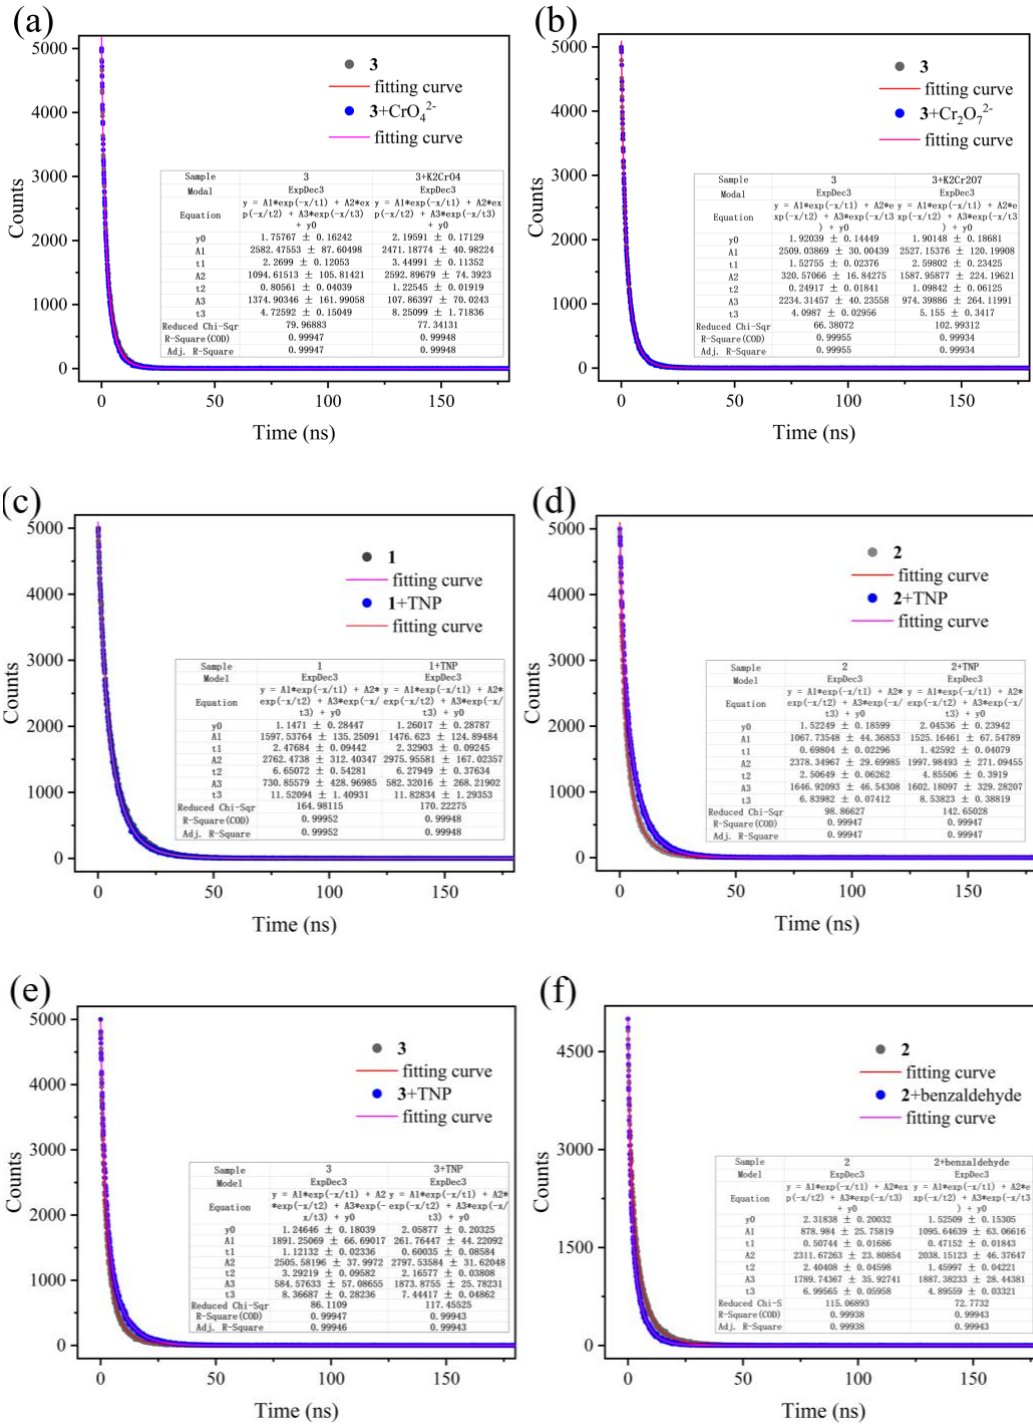

**Fig. S11** Experimental and fitting lifetime curves of the suspension of **1–3** before and after addition of  $\text{CrO}_4^{2-}$ ,  $\text{Cr}_2\text{O}_7^{2-}$ , TNP and benzaldehyde.

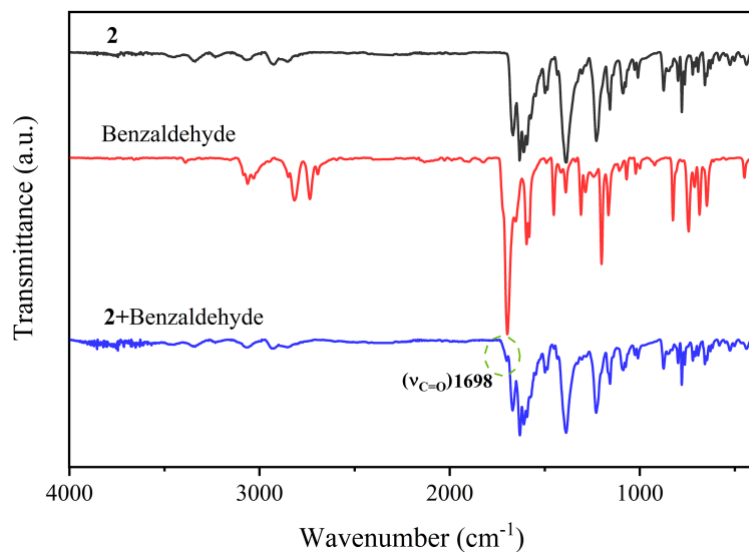

**Fig. S12** IR spectra of benzaldehyde, MOF **2** and MOF **2** after detection for benzaldehyde.

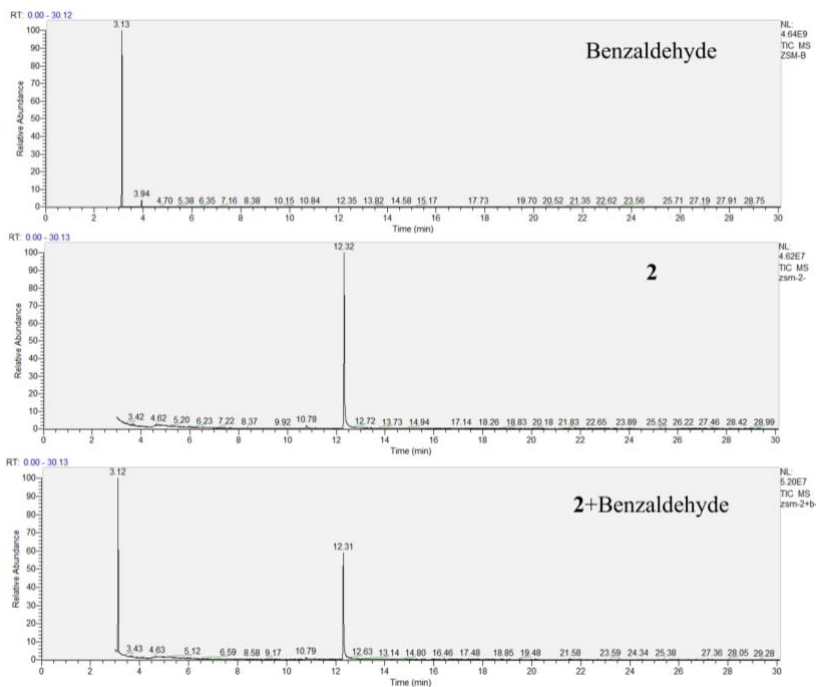

**Fig. S13** Gas chromatography-mass spectra of benzaldehyde, MOF **2** and MOF **2** after detection for benzaldehyde



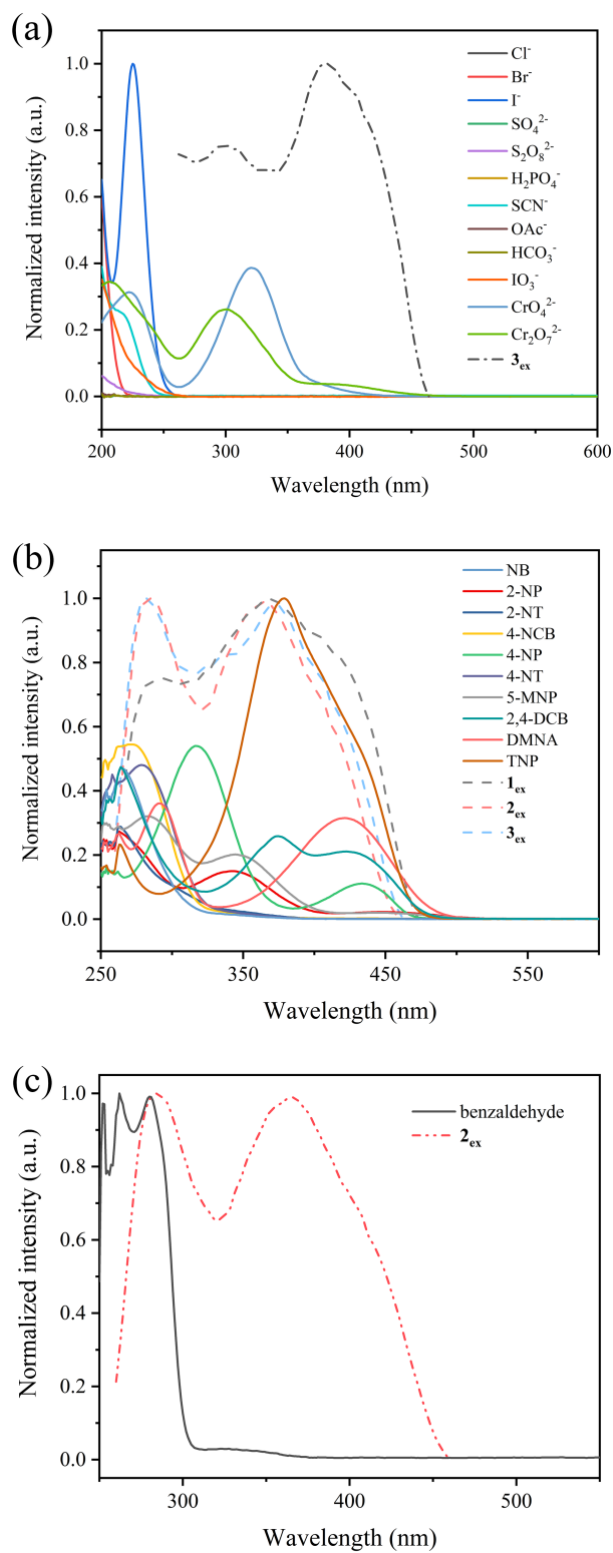

**Fig. S14** Spectral overlap between the absorption spectra of analytes with the normalized excitation spectra of 1–3

## References

1. G. M. Sheldrick, *Acta. Crystallogr. C*, 2015, **71**, 3-8.
2. B. Parmar, Y. Rachuri, K. K. Bisht, R. Laiya and E. Suresh, *Inorg. Chem.*, 2017, **56**, 2627-2638.
3. C. Q. Jiao, M. Sun, F. Liu, Y. N. Zhou, Y. Y. Zhu, Z. G. Sun, D. P. Dong and J. Li, *ACS Omega*, 2018, **3**, 16735-16742.
4. W. Liu, X. Huang, C. Xu, C. Chen, L. Yang, W. Dou, W. Chen, H. Yang and W. Liu, *Chem. Eur. J.*, 2016, **22**, 18769-18776.
5. C. S. Cao, H. C. Hu, H. Xu, W. Z. Qiao and B. Zhao, *CrystEngComm*, 2016, **18**, 4445-4451.
6. C. Chen, X. Zhang, P. Gao and M. Hu, *J. Solid State Chem.*, 2018, **258**, 86-92.
7. X. Y. Sun, X. D. Zhang, Z. H. Xu, Y. Zhao, Z. L. Wang and W. Y. Sun, *J. Coord. Chem.*, 2020, **73**, 2728-2739.
8. P. Verma, U. P. Singh and R. J. Butcher, *CrystEngComm*, 2019, **21**, 5470-5481.
9. S. S. Dhankhar, N. Sharma and C. M. Nagaraja, *Inorg. Chem. Front.*, 2019, **6**, 1058-1067.
10. L. Yang, L. Cao, X. Li, C. Qin, L. Zhao, K. Z. Shao and Z. M. Su, *Dalton Trans.*, 2017, **46**, 7567-7576.
11. G. Chakraborty and S. K. Mandal, *Inorg. Chem.*, 2017, **56**, 14556-14566.
12. Y. Han, P. Yan, J. Sun, G. An, X. Yao, Y. Li and G. Li, *Dalton Trans.*, 2017, **46**, 4642-4653.
13. A. L. Li, Y. H. Qu, L. Fu, C. Han and G. H. Cui, *CrystEngComm*, 2020, **22**, 2656-2666.
14. M. Z. Wu, J. Y. Shi, P. Y. Chen and L. Tian, *New J. Chem.*, 2019, **43**, 10575-10582.
15. D. Wu, K. Zhou, J. Tian, C. Liu, F. Jiang, D. Yuan, Q. Chen and M. Hong, *J. Mater. Chem. C*, 2020, **8**, 9828-9835.
16. P. Y. Du, W. Gu and X. Liu, *Dalton Trans.*, 2016, **45**, 8700-8704.
